# Supplementary material
Source: publisher figshare collection journal article supplement (https://acs.figshare.com/ndownloader/files/9413755)
Supplement: Supplementary file 1 [file 9413755]

Supporting Information for:

## **Ratiometric Fluorescent Probe for Imaging of Pantetheinase in Living Cells**

Yiming Hu,<sup>ab</sup> Hongyu Li,<sup>a</sup> Wen Shi<sup>a\*</sup> and Huimin Ma<sup>ab\*</sup>

<sup>a</sup> *Beijing National Laboratory for Molecular Sciences, Key Laboratory of Analytical Chemistry for Living Biosystems, Institute of Chemistry, Chinese Academy of Sciences, Beijing 100190, China. E-mail: shiwen@iccas.ac.cn; mahm@iccas.ac.cn*

<sup>b</sup> *University of Chinese Academy of Sciences, Beijing 100049, China.*

### **Table of Contents**

Scheme S1. Synthesis of CV-PA

Figure S1. <sup>1</sup>H NMR spectrum of CV-PA-PM

Figure S2. <sup>13</sup>C NMR spectrum of CV-PA-PM

Figure S3. <sup>1</sup>H NMR spectrum of CV-PA

Figure S4. <sup>13</sup>C NMR spectrum of CV-PA

Figure S5. HR-ESI-MS of CV-PA

Figure S6. Absorption spectra of CV-PA reacting with pantetheinase

Figure S7. Absorption and fluorescence spectra of CV and CV-PA-PM

Figure S8. HR-ESI-MS of reaction products

Figure S9. Spectroscopic properties of CV-PA-PM reacting with pantetheinase

Figure S10. Effects of pH and temperature on the fluorescence of CV-PA

Figure S11. Lineweaver-Burk plot for the enzyme-catalyzed reaction

Figure S12. Effects of different inhibitors on the fluorescence of CV-PA and CV

Table S1. IC<sub>50</sub> values of inhibitors towards pantetheinase

Figure S13. Time-dependent fluorescence signal of CV-PA in serum sample

Figure S14. Cell viability

Figure S15. Western blot analysis of HK-2 and LO2 cell lines

Figure S16. Confocal fluorescence images of HK-2 and transfected HK-2 cells

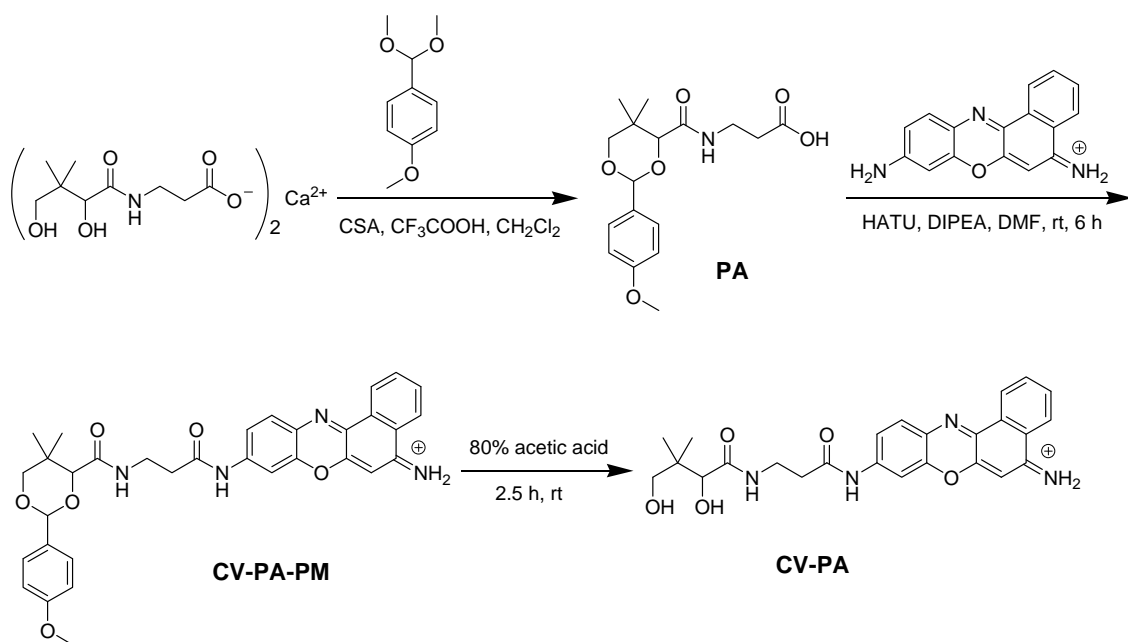

**Scheme S1.** Synthesis of CV-PA.

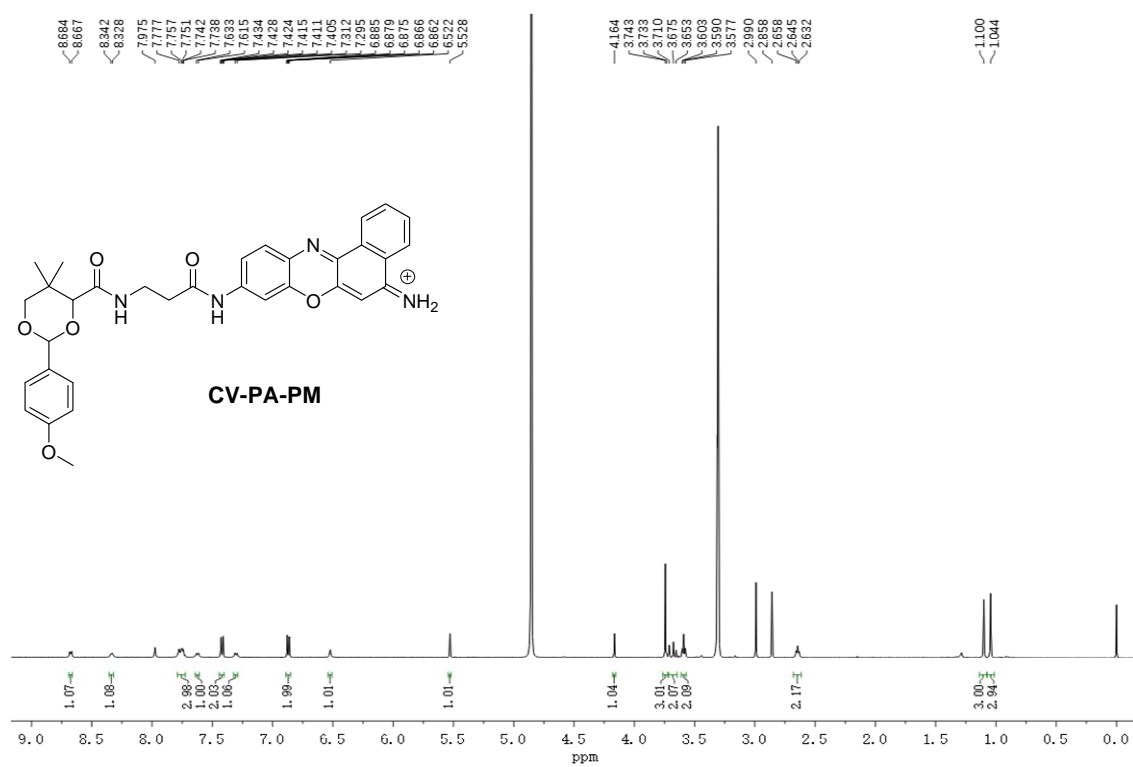

**Figure S1.**  $^1\text{H}$  NMR spectrum of CV-PA-PM (500 MHz,  $\text{CD}_3\text{OD}$ , 298 K).

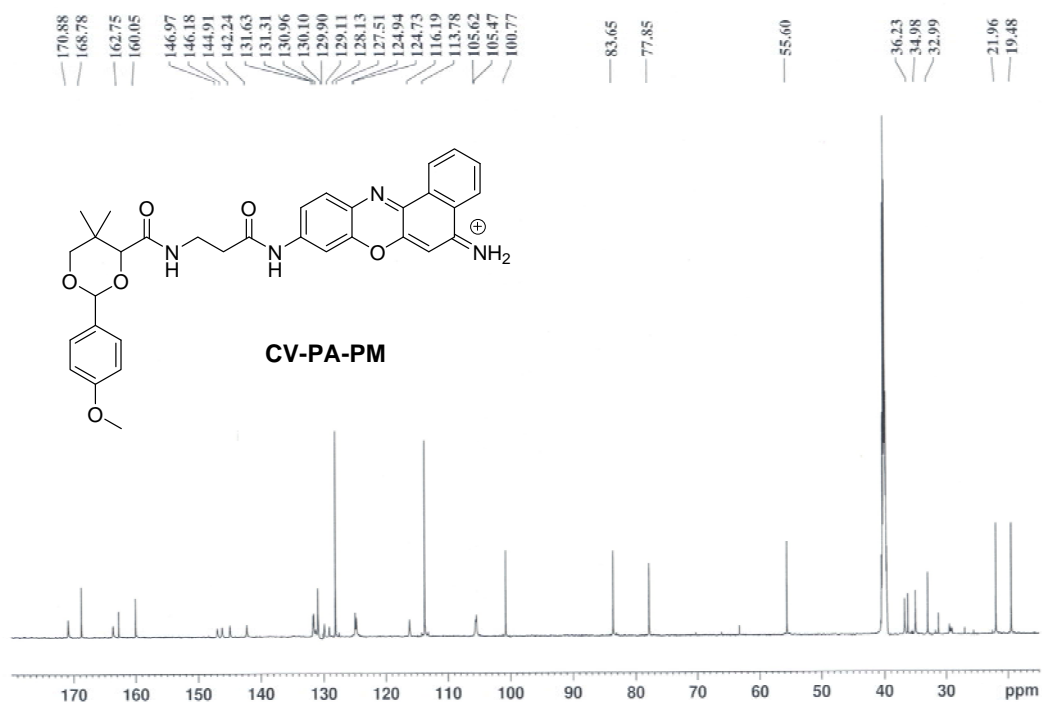

**Figure S2.**  $^{13}\text{C}$  NMR spectrum of CV-PA-PM (150 MHz,  $\text{DMSO-}d_6$ , 298 K).

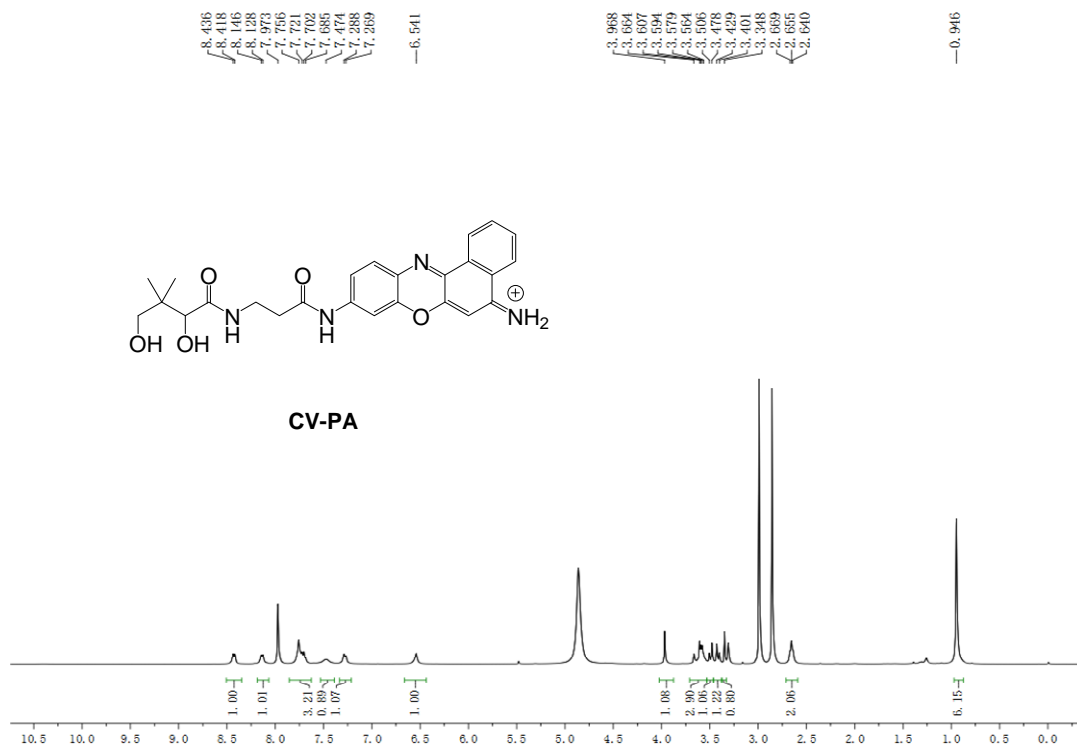

**Figure S3.**  $^1\text{H}$  NMR spectrum of CV-PA (400 MHz,  $\text{CD}_3\text{OD}$ , 298 K).

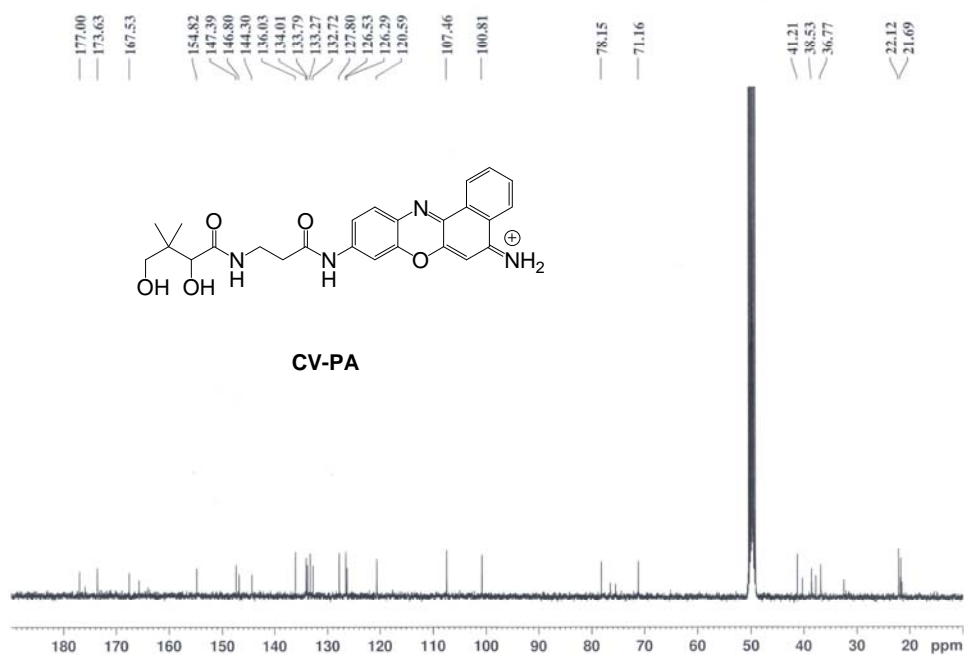

**Figure S4.**  $^{13}\text{C}$  NMR spectrum of CV-PA (100 MHz,  $\text{CD}_3\text{OD}$ , 298 K).

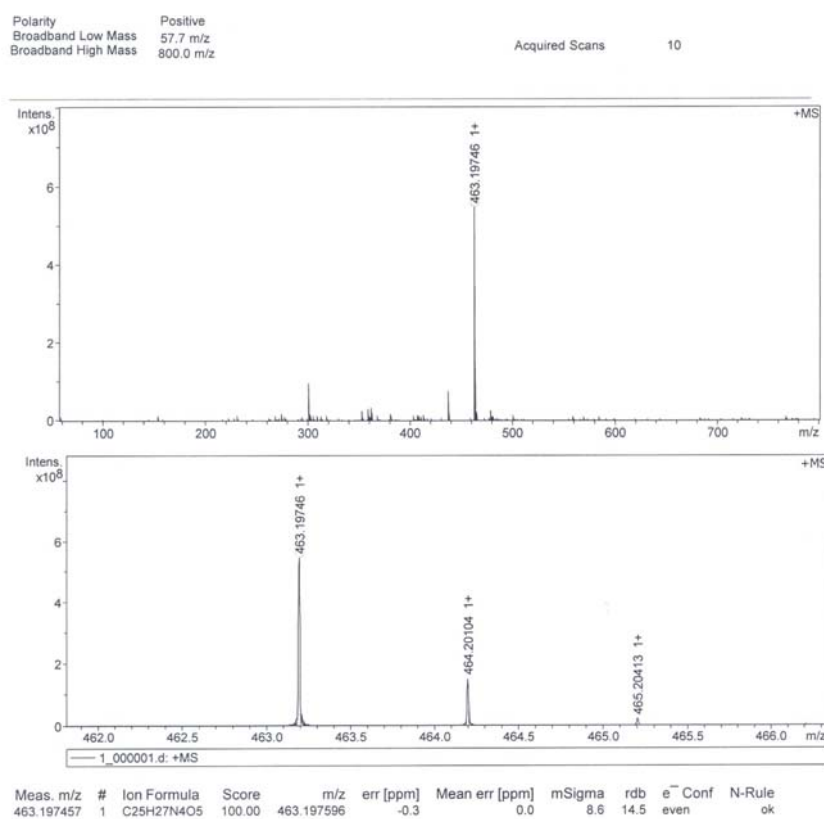

**Figure S5.** HR-ESI-MS of CV-PA.

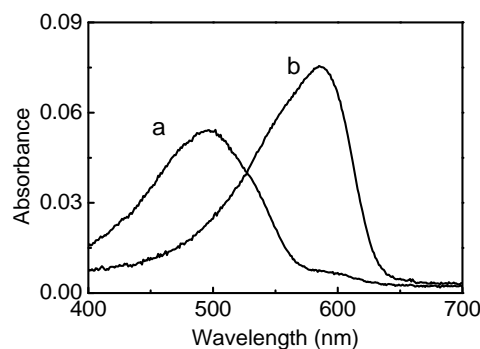

**Figure S6.** Absorption spectra of CV-PA (10  $\mu$ M) reacting without (a) and with (b) pantetheinase (400 ng/mL) at 37  $^{\circ}$ C for 1 h in 20 mM phosphate buffer (pH 7.4).

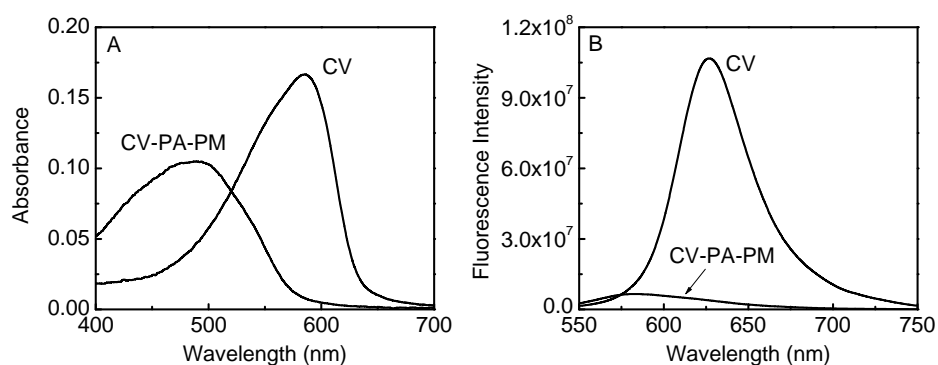

**Figure S7.** (A) Absorption and (B) fluorescence spectra of 10  $\mu$ M CV and CV-PA-PM in pH 7.4 phosphate buffer (20 mM).  $\lambda_{\text{ex}}$  = 525 nm.

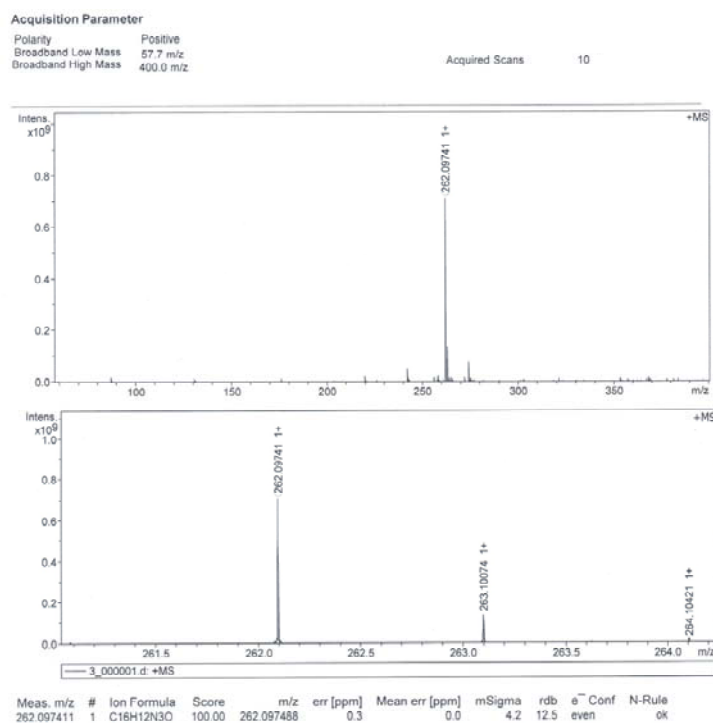

**Figure S8.** HR-ESI-MS of the reaction solution of CV-PA with pantetheinase.

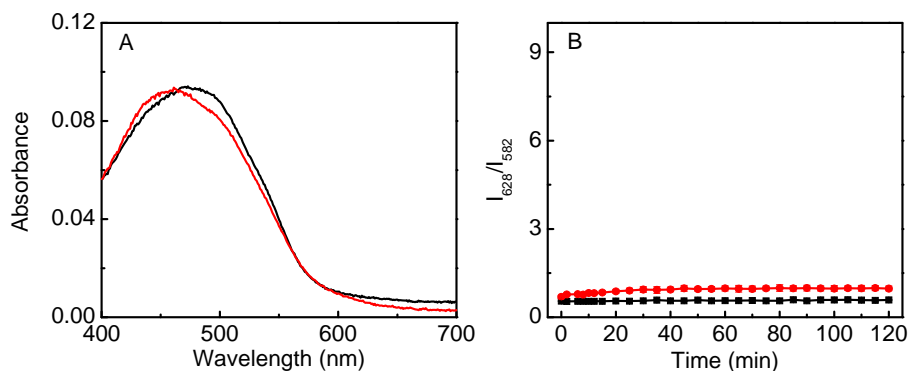

**Figure S9.** (A) Absorption spectra of CV-PA-PM (10  $\mu$ M) before (black) and after (red) reaction with 400 ng/mL pantetheinase. (B) Ratiometric fluorescence responses of CV-PA-PM (10  $\mu$ M) to 0 (black) and 400 ng/mL (red) pantetheinase with time.

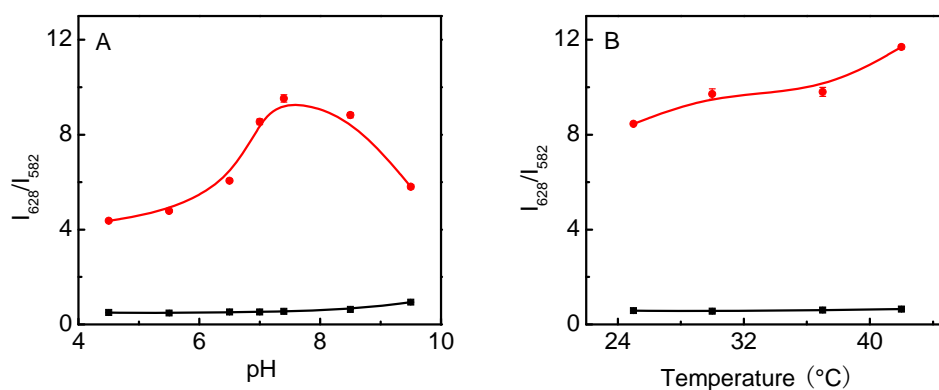

**Figure S10.** Effects of pH (A) and temperature (B) on the ratiometric signal of CV-PA (10  $\mu$ M) reacting with (■) 0 and (●) 400 ng/mL pantetheinase for 2 h.  $\lambda_{\text{ex}} = 525$  nm.

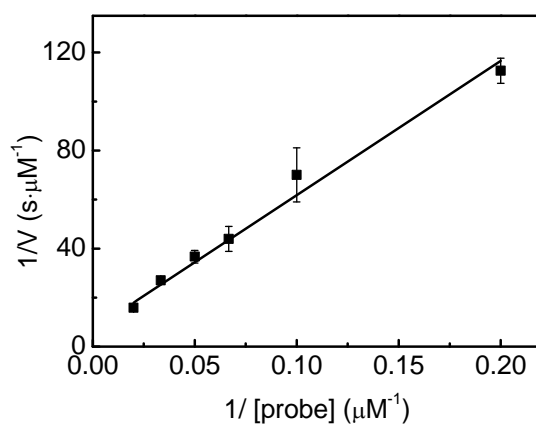

**Figure S11.** Lineweaver-Burk plot of CV-PA (5-50  $\mu$ M) catalyzed by pantetheinase (50 ng/mL) in the phosphate buffer (20 mM, pH 7.4) at 37  $^{\circ}$ C.  $\lambda_{\text{ex}} = 525$  nm.

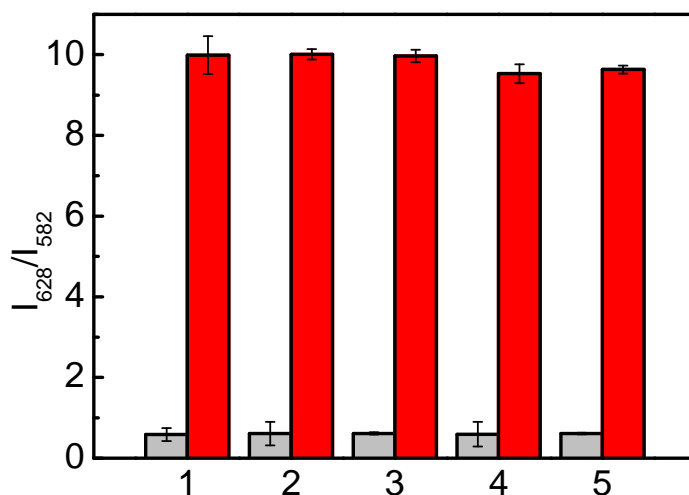

**Figure S12.** Effects of different inhibitors (400  $\mu$ M) on the fluorescence of 10  $\mu$ M of CV-PA (grey) and CV (red). (1) Without inhibitor (control); (2) 8-cyclopentyl-1,3-didropylxanthine (CPDX); (3) roscovitine; (4)  $\beta$ -lapachone; (5) RR6.

**Table S1.** IC<sub>50</sub> values of inhibitors towards pantetheinase

| Inhibitor          | Structure | IC <sub>50</sub> value ( $\mu$ M) <sup>a</sup> |
|--------------------|-----------|------------------------------------------------|
| CPDX               |           | 2.12 $\pm$ 0.21                                |
| roscovitine        |           | 10.10 $\pm$ 1.25                               |
| $\beta$ -lapachone |           | 0.45 $\pm$ 0.05                                |
| RR6                |           | 0.63 $\pm$ 0.03                                |

<sup>a</sup> Mean of three determinations  $\pm$  standard deviation.

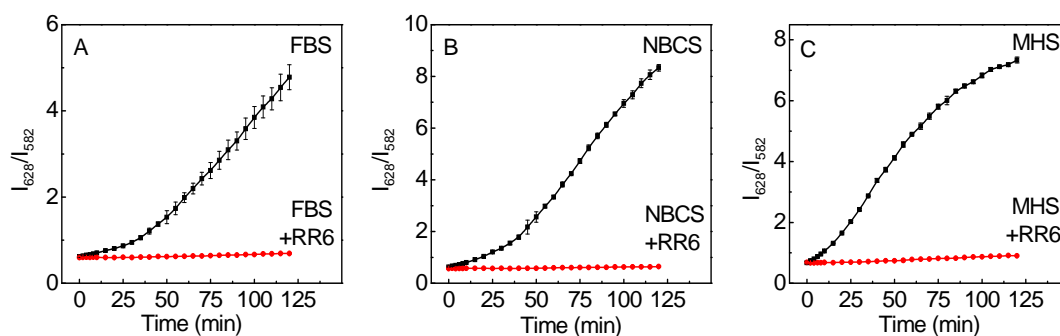

**Figure S13.** Time-dependent fluorescence signal of CV-PA (10  $\mu$ M) in serum samples. (A) FBS; (B) NBCS and (C) MHS without (■) and with (●) 10  $\mu$ M RR6.

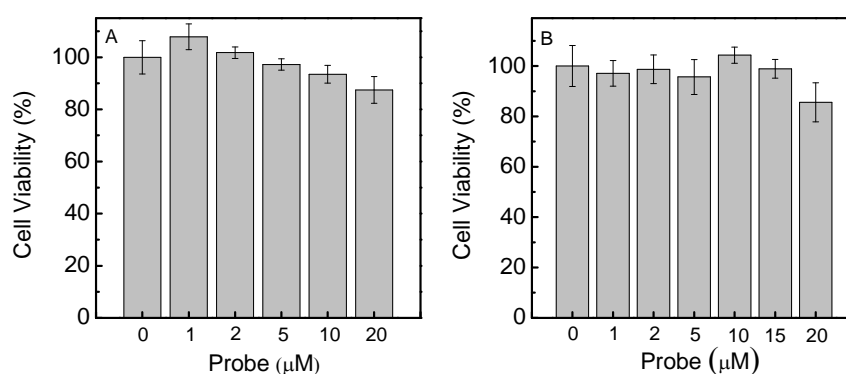

**Figure S14.** Cell viability of (A) HK-2 and (B) LO2 treated with CV-PA at varied concentrations. The results are the mean  $\pm$  standard deviation of five separate measurements

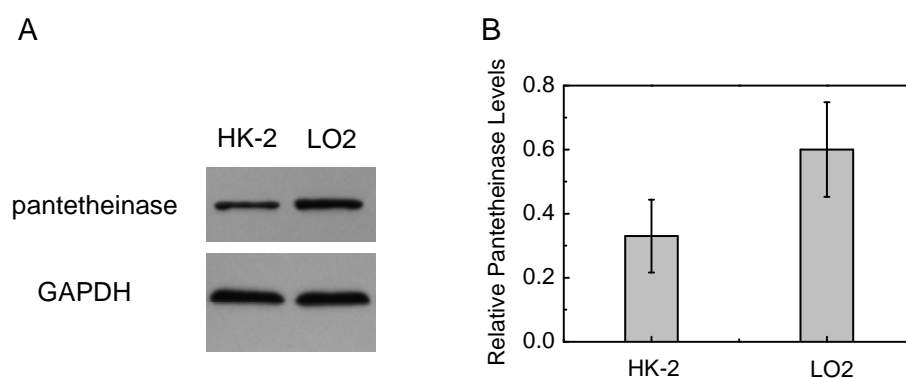

**Figure S15.** (A) Western blot analysis of HK-2 and LO2 cell lines. Glyceraldehyde-3-phosphate dehydrogenase (GAPDH) was used as a protein standard. (B) Relative pantetheinase level in panel A.



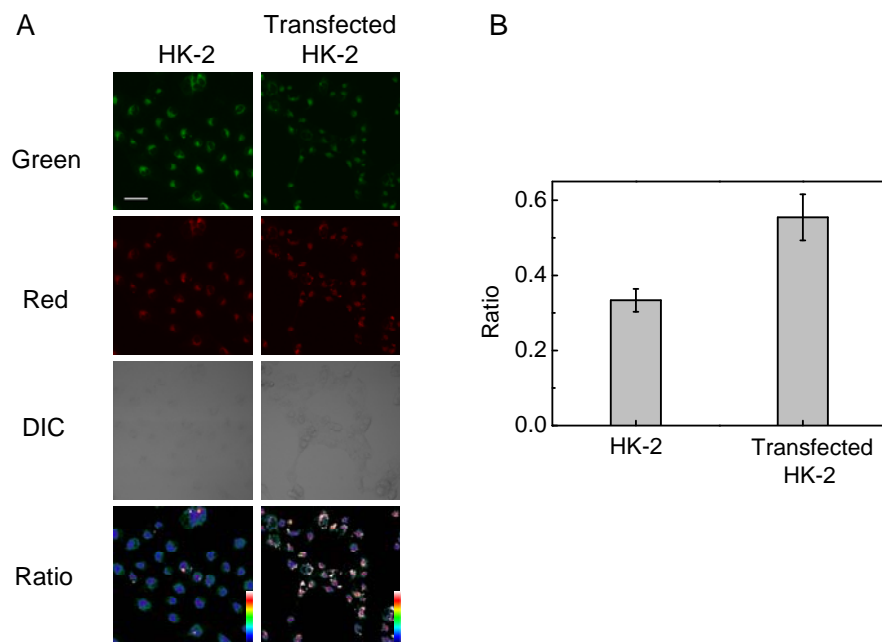

**Figure S16.** (A) Confocal fluorescence images of HK-2 and pantetheinase transfected HK-2 cells. Scale bar: 50  $\mu$ m. (B) The relative ratio value of the corresponding ratio images in panel A.
